# Supplementary material for: Inactivation of Escherichia coli Using Biogenic Silver Nanoparticles and Ultraviolet (UV) Radiation in Water Disinfection Processes
Source: MDPI journal article supplement (doi:10.3390/catal12040430), 2022-04-11
Supplement: s1 [file s1]

Supplementary Material

# Inactivation of *Escherichia coli* Using Biogenic Silver Nanoparticles and Ultraviolet (UV) Radiation in Water Disinfection Processes

Ljubica Tasic <sup>1,\*</sup>, Danijela Stanisic <sup>1</sup>, Caio H. N. Barros <sup>1,2</sup>, Letícia Khater Covesi <sup>1</sup> and Erick R. Bandala <sup>3,\*</sup>

<sup>1</sup> Laboratory of Biological Chemistry, Department of Organic Chemistry, Institute of Chemistry, University of Campinas (UNICAMP), P.O. Box 5147 Campinas, 13083-970, Brazil; dacici.stanisic@gmail.com (D.S.);

caio.henrique@nibr.ie (C.H.N.B.); leticia@i9pi.com.br (L.K.C.)

<sup>2</sup> National Institute for Bioprocessing Research and Training (NIBRT), Dublin, Ireland

<sup>3</sup> Division of Hydrologic Sciences, Desert Research Institute, 775 E. Flamingo Road, Las Vegas, NV 89119, USA

\* Correspondence: ljubica@unicamp.br (L.T.); erick.bandala@dri.edu (E.R.B.); Tel.: +1-702-862-5395 (E.R.B.)

**Citation:** Tasic, L.; Stanisic, D.; Barros, C.H.N.; Covesi, L.K.; Bandala, E.R. Inactivation of *Escherichia coli* Using Biogenic Silver Nanoparticles and Ultraviolet (UV) Radiation in Water Disinfection Processes. *Catalysts* **2022**, *12*, x. <https://doi.org/10.3390/xxxxx>

Academic Editor(s): Aida M. Diez and Vitor J. P. Vilar

Received: 28 February 2022

Accepted: 08 April 2022

Published: date

**Publisher's Note:** MDPI stays neutral with regard to jurisdictional claims in published maps and institutional affiliations.

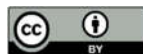

**Copyright:** © 2022 by the authors. Submitted for possible open access publication under the terms and conditions of the Creative Commons Attribution (CC BY) license (<https://creativecommons.org/licenses/by/4.0/>).

**Table S1.** Analysis of capping proteins of biogenic silver nanoparticles using UPLC-MS/MS, shotgun techniques, and identified using the protein BLAST server (NCBI, <https://blast.ncbi.nlm.nih.gov>) [1]:

| AgNP-FU Proteins                                                    | NCBI RefSeq    | Molecular Weight (kDa) | Score | % coverage | Sequence                                                                                                                                                                                                                                                                                                                                                                            |
|---------------------------------------------------------------------|----------------|------------------------|-------|------------|-------------------------------------------------------------------------------------------------------------------------------------------------------------------------------------------------------------------------------------------------------------------------------------------------------------------------------------------------------------------------------------|
| Predicted-glutamine amino-transferase [ <i>Fusarium oxysporum</i> ] |                | 28.3                   | 110   | 6          | MKFLSTLAGALAFTTTSASAIHRNTERTCITPGAIPDLKGS DIRNVGVVLFQALDMI<br>DVFGPLDPLQLVSLSVQQLNLHLIAETLDPVSTAPVAMNKFNSFWPTIPPTKTFAD<br>DLDDLIVPGGPGARNPNLGAVTDYIAKMAPKVKILMTICTGSGIAARAGVLDGH<br>LAATNKNAWATMKAMGPKVNWVSPARFVIDGKIWSSSGVTSGLDLIFAF<br>IETFWGAQQS QR <del>IASIIEHV</del> PRAATDDPFSQHFNITPTEA QPCPKA                                                                              |
| Malate dehydrogenase [ <i>R. solanacearum</i> ]                     |                | 35.4                   | 92    | 5          | MAKAPMRVAV TGAAGQIGYA LLFRIAAGEM LGKDQPVILQ<br>LLEIPDEKAQKALKGVMMEI EDCAFLLAG MEAHADPMTA<br>FKDVDVALLVGARPRGPGMERKDLLSANAQIFTAQGKALNAVASRNVKVLVVG<br>PANTNAYIAMKSAPDLPRENFTAMLRLDHNRLSQIAAKTGKPVSSIEKLFVWGN<br>HSPTMYADYRYATIDGQSVKDMINDPVWNNDVFLPTVGKRGAAIIEARGLSSAAS<br>AANA <del>AIDHVR</del> DWVLGSNGKIVTMGIPSNGDYEIPQDVMFGFPVTTANGKYEYVKG<br>F EVDAYSREKI NITLKELEEE RAGVQHLLG |
| Hypothetical, Zn-peptidase [ <i>F. graminearum</i> ] (FG06655.1)    | XP_011326283.1 | 53.9                   | 89    | 5          | MAPPQEALDF VDFVNASPTP YHAVQSASAR FEKAGFKLIR<br>ERDSWASTLRPGGKYLLTRN ASTIVAFTIG RKWRPGNPVA IVGAHTDSPC<br>LRLKPVSKKT NVGFLQIGVE TYGGGIWTSW FDRDLSIAGR VLVKEGDNFV<br>QKLVKVDKPLVRIPTLAIHL HRQTNFDPNK ETELFPIAGL VAAELNKDVK<br>EKSEEKKDDG EEDEEFKPLK VITERHHPQV LDVIAAEAGV EVSDIVDFEL<br>VLYDTQKSCIGGLADEFIFS PRLDNLGMTY CSVEGLIESV<br>KNESLEEDGTIRLTVCFDHEEIGSTSAQG ANSNLLPSVI         |

|                                                                                          |                |      |    |   |                                                                                                                                                                                                                                                                                                                                                                                                                                                                                                                                                                                |
|------------------------------------------------------------------------------------------|----------------|------|----|---|--------------------------------------------------------------------------------------------------------------------------------------------------------------------------------------------------------------------------------------------------------------------------------------------------------------------------------------------------------------------------------------------------------------------------------------------------------------------------------------------------------------------------------------------------------------------------------|
|                                                                                          |                |      |    |   | RRLSVLPGNRDASSEGSYEAVHHEGEDATAYEQTLRSFLVSADMAHSVHPNYAG<br>KYESS HQPAMNGGTV VKINANQRYA TNSPGIVLIE ECARTAGVPL<br>QLFVVRNDSP CGSTIGPLA AALGMR <del>TLDLGNPQLSMHSI</del> RETGGTADVG<br>YGIRLFREFF EKYGSLEPKI LID                                                                                                                                                                                                                                                                                                                                                                   |
| Hypothetical,<br>dehydrogenase<br>[F. graminearum<br>and<br>F. oxysporum]<br>(FG02461.1) | XP_011318385.1 | 35.2 | 75 | 6 | MFAASRIQRRAFSATARDLS KVTVLGAAGG IGQPLSLLK<br>MNPR <del>VTDLALYDIR</del> GGPGVA ADISHVNTKS SVKGYEPNAA<br>GLKEALSGAEVVLIPAGVPRKPGMTR <del>DDLFN</del> <del>TNASIVR</del> DLAKAAAEAAPKAKLLIIS<br>NPV NSTVPIVKEV YKAAGVYNPK TLFGVTTLDV VRASRFVSEI KGTDPKDENI<br>TVVGGHSGVT IVPLFSQSNH PDLSSNAELV KRVQFGGDEV VKAKDGAGSA<br>TLSMAMAGAR MADSVLRAVQ GEKGVKEPAF VESPLYKDQG IEFFSSQVEL<br>GPEGVEKIHPLGKLDANEK LVDAALVDLK KNIKGVAFV ASNPPK                                                                                                                                                |
| 2-Methylcitrate<br>synthase<br>[F. graminearum<br>PH-1]                                  | XP_011315788.1 | 52.0 | 74 | 4 | MALNLTTSRR ALSSLKPLTR AAFVGARGYA TAEPDLKATL<br>REAIPAKRELLKKVKAHSNK VLGEVKVENT LGGMRGLKAM<br>VWEGSVLDANEGIRFHGRTIKDCQKELPKG KTGTEMLPEA<br>MFWLLLTGQVPSVNQVRGFSRELAEKAQIPEFVSKMLNDFPKDLHPMTQFAMAVS<br>ALNYESKFAKAYEQGINKADYWEPTFDDCISLLAK LPTIAAKIYQ NAYRGGGALP<br>AEVDLEQDWS YNFAAMLGKG GKENENFQDL LRLYLALHGD HEGGNVSAHA<br>THLVGSALSD PFLSYSAGLQGLAGPLHGLA AQEVLRWIIQ MKEAIPSNYT<br>EQDVNDYLWS TLNSGR <del>VVPG YGHAVLR</del> KPDPRFEALMDYA<br>AARPEIANDPVFQLVEKNSR IAEVLKKGKTKNPYPNVD<br>SSSGVLFHHYGFHETLYYTA TFGVSR <del>GLGPLAQLIWDR</del> AL GLPIERPCKSI<br>NLEGILKQVE GQ |

|                                                                                                   |                |      |    |   |                                                                                                                                                                                                                                                                                                                                                                                                                                                                                                                                                                                                                                                                                       |
|---------------------------------------------------------------------------------------------------|----------------|------|----|---|---------------------------------------------------------------------------------------------------------------------------------------------------------------------------------------------------------------------------------------------------------------------------------------------------------------------------------------------------------------------------------------------------------------------------------------------------------------------------------------------------------------------------------------------------------------------------------------------------------------------------------------------------------------------------------------|
| Hypothetical protein<br>FGSG_02204.1<br>[ <i>F. graminearum</i> PH-1]<br>Serine carboxy peptidase | XP_011318096.1 | 59.6 | 69 | 2 | <p>MARGWFFVNCA AVLLALTAGV DAYTVPALSA RAKDSGPKAV</p> <p>NISVPVDHFNHNETIYEPHSD KKFPLRYWFD AQYYRKGGPV IILASGETSG</p> <p>EDRIPFLEHG ILQMLANATG GIGVILEHRY YGTSFPVPDL KPENMRFLST</p> <p>EQALADTAYFAQHVEFPDME EHNLTASTTP YIIYGGSYAG AFAAFARKIY</p> <p>PDLFWGGISS SGVTEAIVDY WQYFEAARLF APGDCAKVTQ KLTHAVDNIL</p> <p>LGDDKEEKKQLKIAFGLLGL RDDDFAMTIS QGIGGLQSN</p> <p>WDPASDSSSFLYCGSVSSD DILFASTRPLAPYVKKWLIS AGYKKQLKYM</p> <p>TNRFLNYIGY IRSNVESDKSGRCDGKTLQ CYSIRGSMND TKLDPNNMSR</p> <p>QWTYQTCTQW GYWQTGSGAP KDQLPMVSRLLIDVEYNTIPC</p> <p>REEFNITTPPNVESINKLGG FNFSYPRVAFIDGEYDPWRA ATPHAIGLPE</p> <p>RESTASEPFILIPYGVHHWDENGLAPGSEEIGLPPPAVKQAQQDIIDFTKAWLEDWE</p> <p>KEK GGATADL</p> |
| Hypothetical protein<br>LOC100191904<br>Dehydrogenase<br>[ <i>F. fujikuroi</i> ]                  | CAM90598.1     | 35.7 | 67 | 8 | <p>MSSPHFSKVLVFGATGEVGS AVALEAHALG AHVSIALRDT</p> <p>TKTNEWISPSQERAADLQRI SADLTDPDSL KRAVHDTGAQ AAFIYAVRSK</p> <p>DALRGAIAAL RDAGIQYVVF LSTSQVRTAG TTKGDIRSIK PDHFIPWQHA</p> <p>QVEIALEELEVPAAVRAGF FASNPLRIYL DRSSEPKQVN LLAPVPHDP</p> <p>IDPKDIGRAA AAVLVNPRLYASGYQGEPKK DVVYLSGPAL LSQTEQWEII</p> <p>NRELVVAGKPEVKVNHITVE QYLENLAKLH VPDVVAKSLA</p> <p>KSMVETRALLYAPEDYEKSRG NVELLTGRKATSFDEFVKRE IPRYFD</p>                                                                                                                                                                                                                                                                       |
| Malate dehydrogenase<br>[ <i>F. moniliforme</i> and<br><i>F. verticillioides</i> ]                |                | 35.4 | 85 | 7 | <p>MAKAPMRVAVTGAAGQIGYA LLFRIAAGEM LGKDQPVILQ</p> <p>LLEIPDEKAQKALKGVMMEI EDCAFPLLAG MEAHADPMTA FKDVDVALLV</p> <p>GARPRGPGME RKDLLSANAQ IFTAQGKALN AVASRNVKVL VVGNPANTNA</p> <p>YIAMKSAPDLPRENFTAMLR LDHNRALSQIAAKTGKPVSS IEKLFVWGNH</p> <p>SPTMYADYRY ATIDGQSVKD MINDPVWNND VFLPTVGKRGAAIIEARGLS</p>                                                                                                                                                                                                                                                                                                                                                                                 |

|                                                                                                     |            |      |    |   |                                                                                                                                                                                                                                                                                                                                                                                                                                                                                                                                                                                                                                                                                                                                                           |
|-----------------------------------------------------------------------------------------------------|------------|------|----|---|-----------------------------------------------------------------------------------------------------------------------------------------------------------------------------------------------------------------------------------------------------------------------------------------------------------------------------------------------------------------------------------------------------------------------------------------------------------------------------------------------------------------------------------------------------------------------------------------------------------------------------------------------------------------------------------------------------------------------------------------------------------|
|                                                                                                     |            |      |    |   | SAASAANAIDHVRDWVLGS NGKIVTMGIP SNGDYEIPQD<br>VMFGFPVTTANGKYEVVKGF EVDAYSREKINITLKELEE RAGVQHLLG                                                                                                                                                                                                                                                                                                                                                                                                                                                                                                                                                                                                                                                           |
| Putative<br>glucoamylase<br>GMY1<br>[ <i>F. verticillioides</i><br>and<br><i>F. graminearum</i> ]   | ABY89280.1 | 68.7 | 84 | 1 | MYFVSSAFLGSLVQLQNVLG RPTFDERSLL QERQSSVDSF<br>IKSESSIAIEQLLCNIGSDG CNSKNVATGI VIASPDQTDP<br>DYFYTWTRDAALVFKYVVDV FINQYDAGLQRKIQEYIASQ AKLQGVSNPS<br>GSLSDGSLG EAKFNVDMSAFTGGWGRPQR DGPALRATAM ITYANWLIAN<br>GYTSTANDIV WPVVRNDLNY VAQYWNQTGF DLWEEVKGSS<br>FFTTGSQYRGAALAKKLGKS GDNYSNIAPQALCFLQTYWI SSGKYVDSNI<br>NVNDGRTGKD ANSILSSIHN FDPALNCDPA TFQPCSDKALANHKAVTDSF<br>RSWNINKGIS QGSAVAVGRY VEDVYYNGNPWYLATLAAAE<br>QLYDAIYVWKQQGSITVSDV SLSFFKDLVS SVSTGTYSAD<br>SATFKSITDAVSKYADGYVA IVAKYVGTGDGHLAEQFDKND<br>GHPLSATDLTWSYAAFLSAA DRRAGVIPPS WAGSVAAPVN QCGTNTVAGS<br>YSSATATSFP ASQTPKGGVP TPTGTQTSTS TSTSTSSST GTSCPTATSV<br>AVTFQEVVTTNFGDTIKIVG NIAALGNWDTSKAVALSASD<br>YTASNPVWKATISLTAGQSI QYKYINVKKD GSLTWEKDPN<br>RTYAVPKTCATTATKSDKWQ S |
| Hypothetical<br>protein<br>LOC100191904<br>Reductase<br>[ <i>Botryotinia</i><br><i>fuckeliana</i> ] |            | 35.7 | 69 | 8 | MSSPHFSKVL VFGATGEVGS AVALEAHALG AHVSIALRDT<br>TKTNEWISPSQERAADLQRI SADLTDPDSL KRAVHDTGAQ AAFIYAVRSK<br>DALRGAIAAL RDAGIQYVVV LSTSQVRTAG TTKGDIRSIK PDHFIPWQHA<br>QVEIALEELEVPHAAVRAGF FASNPLRIYL DRSSEPKQVN LLAPEVPHDP<br>IDPKDIGRAA AAVLVNPRLY ASGYQGEPKK DVVYLSGPAL LSQTEQWEII<br>NRELVVAGKPEVKVNHITVE QYLENLAKLH VPDVVAKSLA<br>KSMVETRALYAPEDYEKSRG NVELLTGRKATSFDEFVKRE IPRYFD                                                                                                                                                                                                                                                                                                                                                                       |

|                                                                                                                                                                                  |                |      |     |    |                                                                                                                                                                                                                                                                                                                                                                                                                                                                                                                                                       |
|----------------------------------------------------------------------------------------------------------------------------------------------------------------------------------|----------------|------|-----|----|-------------------------------------------------------------------------------------------------------------------------------------------------------------------------------------------------------------------------------------------------------------------------------------------------------------------------------------------------------------------------------------------------------------------------------------------------------------------------------------------------------------------------------------------------------|
| NAD(P) <sup>+</sup> -specific<br>glutamate<br>dehydrogenase<br>[ <i>F. graminearum</i> ,<br><i>F. oxysporum</i> and<br><i>F. oxysporum f.</i><br><i>sp. lycopersici</i><br>4287] | XP_018234470.1 | 48.8 | 62  | 4  | <p>MSHLPQEPEF EQAYGELASA LENSSEFNEH PEYRTALAVA<br/>AIPERVIQFRVWVNDKGNL QVNRGYRVQFNGALGPYKGG LRFHPSVNLS<br/>ILKFLGFEQI 101 FKNALTGLNM GGGKGGADFD PKGKSDAEIR RFCQAFMTEL<br/>SKHIGAETDVPAGDIGVGR EIGYLFGAYR KFANRWEGVL TGKGLSWGGS<br/>LIRPEATGYG LVYYVEYMLK HANRGTFEKG RVALSGSGNV AQYAALKIIE<br/>LGGSVVSLSDSKGALVAKEG SSFTPEQIHN IAALKIKHQA<br/>LTTFEHGDQFTWIEGARPWVHVKGVDIALP SATQNEVSKE EAQALVDAGA<br/>FIVAEGSNMG CTAEAIDVFEAHRKEKGAEA LWYAPGKASN CCGVAVSGLE<br/>MAQNSQRIQW TEKEVDDRLK AIMKDAFVAG LETAQKYVEA KEGELPSLIA<br/>GSNIAGFIKV AEAMHDQGDWF</p> |
| Porin<br>[ <i>Ralstonia</i><br><i>pickettii</i> ]                                                                                                                                | WP_012763112.1 | 39.3 | 152 | 16 | <p>MKMKLFAAAVAALAAGGAYA QSSVTLYGVV DAGLTYANKV<br/>PNGNGGGSSRVGLDSGGLSG SRWGLRGVED LGGGLKGIFN LESGFTIDDG<br/>KSAQGGRLFG RNAYVGLQGQWGQLTLGRQQ NLLYDFSLIY DPMIAASRYG<br/>LANQDAFFSGRADNAVKEYG TFGGLSVSAL YSFNRDNEQ PGLPKLGREW<br/>SLGANYAGGP FSVGAVYDQS NQTTIATADN KEQRATIAGT YAFGPAKLYA<br/>GYRWYHANFATVAGNGNLRS NLYWLGAGYQ ATPALTLTGT AYYQQFKNSN<br/>AGNPSWLFVVG TDYALSKRTDAYFNLAYAKN SSGSGLGVN LNKTDSYAGT<br/>TLGSTNFGNQNVYSSPAAGN ANQFGATVGI RHKF</p>                                                                                                |
| ADP, ATP<br>carrier protein<br>[ <i>F. oxysporum f.</i><br><i>sp. lycopersici</i><br>4287]                                                                                       | XP_018243474.1 | 33.6 | 113 | 7  | <p>MSEQPQKVLG MPPFVADFLM GGVSAAVSKT AAAPIERVKL<br/>LIQNQDEMLKTGRLDRKYNG IGDCFKRTMA DEGVMSLWRG<br/>NTANVIRYFTQALNFAFRDKFKKMFYKK DKDGYALWMA GNLASGGAAG<br/>ATSLLFVYSL DYARTRLANDAKNAKSGGDR QFNGLVDVYK KTLASDGIAG<br/>LYRGFMPSVA GIIVYRGLYF GMYDSIKPVV LTGPLANNFL<br/>ASFALGWIVTTGAGIASYPL DTIRRRMMMTSGEAVKYKNT LDAARQIVAK<br/>EGVKSLEFKGA GANILRGVAG AGVLSIYDQL QVLLFGKAFK</p>                                                                                                                                                                          |

|                                                                                                                                                               |                            |      |     |   |                                                                                                                                                                                                                                                                                                                                                                                                                                                                                                                                                                                                                                                                                  |
|---------------------------------------------------------------------------------------------------------------------------------------------------------------|----------------------------|------|-----|---|----------------------------------------------------------------------------------------------------------------------------------------------------------------------------------------------------------------------------------------------------------------------------------------------------------------------------------------------------------------------------------------------------------------------------------------------------------------------------------------------------------------------------------------------------------------------------------------------------------------------------------------------------------------------------------|
| ATP synthase<br>beta chain,<br>mitochondrial<br>precursor<br>[ <i>Neurospora</i><br><i>crassa</i> and<br><i>F. oxysporum</i> f.<br><i>sp. cubense</i> race 4] | XP_963253.2;<br>EMT62383.1 | 55.5 | 112 | 6 | <p>MFKSGISAF A RTARPSFAAA SRRAVRPAAL NLRAPALSRF</p> <p>ASSAGVGDGKIYQVIGAVVD VKFDTDKLPP ILNALETQNN GQKLVLVEVSQ</p> <p>HLGENVVRCI AMDGTEGLVR <b>GAKASDTGAP ITIPVGPATL GRI</b>INVTGDP</p> <p>IDERGPIKTDKFRPIHAEAP EFVEQSTTAE ILVTGIKVVD LLAPYARGGK</p> <p>IGLFGGAGVG KTVFIQELIN NIAKAHGGYS VFTGVGERTR EGNDLYHEMQ</p> <p>ETSVIQLDGD SKVALVFGQM NEPPGARARV ALTGLTIAEY FRDEEGQDVL</p> <p>LFIDNIFR<b>FT QAGSEVSALL GRIP</b>SAVGYQ PTLAVDMGQM QERITTTTKG</p> <p>SITSVQAVYVPADDLTDPAP ATTFAHLDAT TVLSRGISEL GIYPAVDPLD</p> <p>SKSRMLDPRI VGQEHYETAT RVQQILQEYK SLQDIILG MDELSEADKL</p> <p>TVERARKIQRFLSQPFTVAQ VFTGIEGKLV DLKDTIASFK</p> <p>AILAGEGDDLPEGAFYMGVD FASARAKGEK ILAELEGQA</p> |
| Mitochondrial<br>outer membrane<br>protein porin<br>[ <i>F. graminearum</i> ]                                                                                 | PCD31551.1                 | 37.1 | 87  | 3 | <p>MSVPAFSDIA KPANDLLNKD FYHLSATTFE FKDTAPNGVA</p> <p>FKVTGKSSHEKATSAAIEGK YTDKPTGTTS PSSSSTLSQ SPSPSPPPVS</p> <p>NPRRKQNLPS LSVSRILGPK SGWPIGFATF VRPGFAQLLM FYSRTGLTLT</p> <p>QTWNTANALDTKIEVADSLA KGLKLEGLFN FLPATAAKGA KFNLFHKQPG</p> <p>FHGRAFFDLL KGPVANVDV VGHEGFLAGA SAGYDANKAA LTAYSAAVGY</p> <p>AAPQYSAAITASDNLSVFAA SYHVKVNSQV EAGAKATWNS KTGNVAGLEV</p> <p>ASKYRIDPVS FTKVKINDR<b>G IAALAYNVLL</b> REGVTLGLGG SFDTQKLDQA</p> <p>THKLGASFTFEG</p>                                                                                                                                                                                                                     |

|                                                                                                          |                |      |    |   |                                                                                                                                                                                                                                                                                                                                                                                                                                                                                                                                                                                         |
|----------------------------------------------------------------------------------------------------------|----------------|------|----|---|-----------------------------------------------------------------------------------------------------------------------------------------------------------------------------------------------------------------------------------------------------------------------------------------------------------------------------------------------------------------------------------------------------------------------------------------------------------------------------------------------------------------------------------------------------------------------------------------|
| 6-Phospho<br>gluconate<br>dehydrogenase,<br>decarboxylase 1<br>[ <i>Aspergillus niger</i><br>CBS 513.88] | XP_001394208.2 | 54.1 | 87 | 4 | MADQAVADFG LIGLAVMGQN LILNAADHGF TVCAYNRTTS<br>KVDRFLENEAKGKPIVGAHS VEEFCAKLKR PRRIMLLVMA GKPVDQFIES<br>LLPHLEKEDI IIDGGNSHFP DSNRRTKYLA EKGIRFVGS G VSGGEEGARY<br>GPSLMPGGNEEAWPYIKDVF QSISAKSDGE ACCDWVGDEG AGHFVKMVHN<br>GIEYGDMQLI CEAYDILKRG LGLPAKEIAD VFAKWNKGVL DSFLIEITRD<br>VLYFNDNDGTPLVEKILDKA GQKGTGKWT AINALDLGMPV TLIGEAVFSR<br>CLSALKDERI RASSLLDGPT PEFTGDKQAF IDDL EQALYA SKIISYAQGF<br>MLIQEAAREYGWKL NKPSIA LMWRGGCIIR SVFLKDITNA YRKNPDLENL<br>LFDEFFNTAI KKAQSGWRNV VSKGALWGIP TPAFSTALS F YDGYRTRDLP<br>ANLLQAQRDYFGAHTFRIKP EHANETYPEG KDIHVNW TGR GGNVSASTYI A |
| Predicted<br>protein<br>Glutamin<br>amidotransferase<br>[ <i>F. oxysporum</i> ]                          |                | 28.3 | 84 | 6 | MKFLSTLAGA LAFTTTSASA IAHRNTERTC ITPGAIPDLK<br>GSDIRNVGVVLFQALDMIDV FGPLDPLQLV SLSVQQNLNH LIAETLDPVS<br>TAPVAMNKFN SSFWPTIPPT KTFADDLDLD LLIVPGGPGA RNP NLGAVTD<br>YIAKMAPKV KILMTICTGSG IAARAGVLDG HLAATNKNAW ATMKAMGPKV<br>NWVSPARFVI DGKIWSSSGV TSGLDLIFAF IETFWGAQQS QR IASIIIEHV<br>PRAATDDPF SQHFNITPTEA QPCPKA IASIIIEHVPR                                                                                                                                                                                                                                                       |
| Quinase, HSP70<br>actin<br>[ <i>F. graminearum</i><br>and<br><i>F. oxysporum</i> ]                       | XP_018238735.1 | 85.9 | 82 | 4 | MSVVGIDFGT LKTVIAIARN RGV DVVTNEV SNRATPSLVG<br>FGPKSRYLG EAAKTQEISNL KNTVSSLKRL AGRSFNDPDI QVEQQYVTAP<br>LVDVNGQVGA EVNYLGKKEH FTATQLV GMY LSKIKQTAGA ELKLPVQDVC<br>MSVPPWFTDVQRRALIDA AE IAGLRVLR LI NDGTAAALGW GITKLDLPAP<br>EEPARRVCFI DIGHSSYTVS IVEFKKGELA VKATTWDKDF GGRDFDRALV<br>EHLAKEFKGKYKVDIMTHGR ALARTIAAAE KTKKILSANQ QAPVNIESLM<br>NDIDASAMIT RQEF EAMIEP LLQRTHHPLE EALAQA KLT K DDIDIIEVVG<br>GGSRVPALKERIQAFFGKTL SFTLNAD EAL ARGSAFSCAI LSPVFRVRDF<br>AVQDIISYPI EFGWEKAPDI PDEDTSLTVF NKG NVMPSTK ILTFYRKQPF                                                       |



|                                                                                                   |                |      |    |    |                                                                                                                                                                                                                                                                                                                                                                                                                                                                                                                                                |
|---------------------------------------------------------------------------------------------------|----------------|------|----|----|------------------------------------------------------------------------------------------------------------------------------------------------------------------------------------------------------------------------------------------------------------------------------------------------------------------------------------------------------------------------------------------------------------------------------------------------------------------------------------------------------------------------------------------------|
|                                                                                                   |                |      |    |    | <p>DLEARYAQPELLPGKTNPWI GRFSVKNVKA DGKDDFMICK LKARVNIHGV<br/> LNVETGYVVE EEEVEEEVNE DPDVSLPAPP MASSSPDSV STSSASVGD<br/> DSRAYPVKRQRLNDDDDKL LCSAAVDEN LEPSTYENRS LTYTSHKAME<br/> TDKDAPKKTR KVKKQVRKGD LPISTGSASL DDSTKASLE KESAMVMEDK<br/> LVADTEKKNELEAYIDLR AKLDEQYSEF ASDEEKETIK AKLEATEDWL<br/> YEDGEDTTKG VYVAKIDEIR <b>AMAGPIVQRH</b> FEKVEAERQA ALEKAEAERA<br/> AKKAEEDARKAQDAEKATAD QEMKDADAQD AEGTADPQ</p>                                                                                                                           |
| Putative histone<br>H2B protein<br>[ <i>Phaeoacremoniu</i><br><i>m minimum</i><br>UCRPA7]         | XP_007912731.1 | 14.8 | 89 | 11 | <p>MPPKAADKKP AAKAPVASKA PEKKDAGKKT ASTGEKKKRT<br/> KARRETYSSYIKVLKQVHP DTGISNR<b>AMS ILNSFVNDIF ER</b>VATEASKL<br/> AAYNKKSTIS SREIQTSVRL ILPGELAKHA VSEGTKAVTK YSSSTK</p>                                                                                                                                                                                                                                                                                                                                                                    |
| Integral<br>membrane<br>protein<br>[ <i>Pyrenophora</i><br><i>tritici-repentis</i> Pt-<br>1C-BFP] | XP_001933871.1 | 47.8 | 82 | 2  | <p>MLGTPLNCEL GEGEVVVNND LRISFHRTIR VPDNDQKSFL<br/> PPDLGAYPLKPIQAYSKKMP TEMTSKGGLF FPMYQSEAMW INFECRKSQH<br/> YIIKIYVGGV NAISGEAAVE DAGTKLRRQA KLARQHANVD AASSLQDYII<br/> VPGQKWLDGIAEADGSVRQF VAMPFSGSYS VESQVTGKDA AGGIQFEITP<br/> YKPPQVASNT QRSANGHQKS FSIFVKTLTG KHITLSVWKE DTISMIKDMI<br/> QVKEGIPLSQQR<b>LIFNGKQL EDGR</b>TLADYG IENEFTIVLV LNLRGGGTGP<br/> PLEMAVAAGG KIKQGIVADK LADHWQSART TVLNVQILNS AVYRTVTGED<br/> PPTMPIDAKTYARHGLPFYD LYEEQSGISG DFSMIKSIGQ IDHKEDDTAT<br/> PKIVKIGEA QLRVGLTNP NGPLRGFRTA SDLKKEYEGF HVVQF</p> |

|                                                                                                                       |                |      |    |    |                                                                                                                                                                                                                                                                          |
|-----------------------------------------------------------------------------------------------------------------------|----------------|------|----|----|--------------------------------------------------------------------------------------------------------------------------------------------------------------------------------------------------------------------------------------------------------------------------|
| Rs15_podan 40s<br>ribosomal<br>protein<br>s15 (s12)<br>[ <i>F. graminearum</i><br>and <i>F.</i><br><i>oxysporum</i> ] | XP_009251452.1 | 17.5 | 78 | 10 | MADEYDAEQA AELKRKRAFR KFSYRGIDLD QLDDLSSDQL<br>RDVVHARARRRINRGLKRRP MGLIKLRKA KQEAQPNEKP DLVKTHLRDM<br>IVVPEMIGSV IGIYSGKEFN QVEIKPEMVG HYLAEFSISY KPVKHGRPGI<br>GATHSSRFIPLK                                                                                            |
| Nucleoside<br>diphosphate<br>kinase<br>[ <i>F. graminearum</i><br>PH-1]                                               | XP_011324585.1 | 25.9 | 60 | 7  | MVAEEPQRK DPAVSGKENS KQRRRTAEN LAPPFFALLF<br>ALLAFYILFSPSSSLSPV PVCHSTISS VSSQVIPDK NIAKMSSSEQ TFIAIKPDGV<br>QRGLVGPIIS RFENRGFKLA AIKLMTPGKE HLEKHYADLA<br>GKPFFAGLIEYMNSGPICAM VWEGRDAVKT GRSILGATNP LASSPGTIRG<br>DYAIDVGRNV CHGSDSVENA QKEIALWFKE GEVVSWSAQ FNWVYEKA |

| AgNP-OR<br>Proteins                                                                 | NCBI RefSeq    | Molecular Weight<br>(kDa) | Score | % coverage | Sequence                                                                                                                                                                                                                                                                                                                                                                                                                                                                                                                                                                                                                                                                                                                                                                                                                                                                                                                     |
|-------------------------------------------------------------------------------------|----------------|---------------------------|-------|------------|------------------------------------------------------------------------------------------------------------------------------------------------------------------------------------------------------------------------------------------------------------------------------------------------------------------------------------------------------------------------------------------------------------------------------------------------------------------------------------------------------------------------------------------------------------------------------------------------------------------------------------------------------------------------------------------------------------------------------------------------------------------------------------------------------------------------------------------------------------------------------------------------------------------------------|
| DNA<br>polymerase<br>epsilon catalytic<br>A-like isoform<br>X1<br>[Citrus sinensis] | XP_006471371.1 | 253.8                     | 50.5  | 0.5%       | MDRRRWDRQDGRRTKKQKLIRSAEEEELEAKLGYDLFSEGDKRL<br>GWLLTFASSSLEDEDTRKVYSCIDLYFVSQDGSTFKSKYKFRP<br>YFYAATKEKMEMDVEAYLRRRYESQIADIEILEKEDLDLKNHL<br>SGLHKSYLKISFDTVQQLMDVKKDLLQVVERNQAKFDAAEAYE<br>SILTGKREQRPQDFLDCIVDLREYDVPYHIRFAIDNDVRCGQW<br>YDVSVSSTGPLLEKRVDLLQRAEVHVCAFDIETTKLPLKFPDA<br>DYDIIMMISYMLDGQGYLIINRECVGEDIEDLEYTPKPEFEGY<br>FKVTNVNNEIELLRLWFAHMQEVKPGIYVTYNGDYFDWPFLET<br>RAAHHGFKMSEELGFQCDKNQGECRAKFACHLDCFAWVKRDSY<br>LPQGSQGLKAVTKAKLGYDPLEVNPEDMVRFAKEKPQMMA SYS<br>VSDAVATYYLYMTYVHPFIFSLATIIPMSPDEVLRKGSGLTCE<br>MLLMVQAYKANVICPNKHQSDPEKFYRNHLESETYIGGHVEC<br>LESGVFRSDLPTSFKLDPSAYEQLLNNLDRDLQYAIKVEGKMD<br>LESVSNYDEVKNAIMEKLLRLQEPIREECPLIYHLDVAAMYP<br>NIILTNR LQPPSIVTDEVCTACDFNRPGKTC LRKLEWVWRGEI<br>FMGKRSDYYHLKKQIESEFVDGTNGHLSKSFLDLPKMEQQSRL<br>KDRLKKYCQKAYKRVLDKPVTELREAGICMRENSFYVDTVRSF<br>RDRRYEYKGLNKVWKGKLSEAKASGNSIKIQEAQDMVVLYDSL<br>QLAHKCILNSFYGYVMRKGARWYSMEMAGVVITYTGAKIIQNAR |

LLIEKIGKPLELDTDGIWCVLPGSFPENFTFKTKDLKKKLTIS  
YPCVMLNVDVARNNTNDQYQTLVDPVSKTYETHSECSIEFEVD  
GPYKAMILPASKEEGILIKKRYAVFNDDGTLAELKGFEIKRRG  
ELKLIKVFQAELFDKFLHGSTIEECYSAVAANRWLDLLDNQ  
GKDIADSELIDYISESSTMSKSLADYGEQKSCAVTTARRLSDF  
LGDTMVKDKGLRCQYIVACEPQGTPVSERAVPVAIFETDAEIM  
KFYLRKWCKTSSDVGIRSIVDWSYKQRLSSAIQK**IITIPAAM**  
**QK**VSNPVPRVVHPDWLYKKVREKEDKFRQRKLVDIFSSLKKDD  
FLNKTCAETNLMDENVEDLEDFPKKRNSVNGPRPIVRCFEVNNEQKTVKTTDQV  
DSLRQQLEPSEVSDQQPSSQNAIDTENIDRIVDYKGWLELKKRWKDNLDRKKQK  
LGSLRASHQANGVSESLGDMINHKEAQRRTGVGSYFRRQETAMTRC  
HWQIIQLVPSSQSGVFLAWVVVEGIMVRIPITVPRLYLNSKD  
PIVEKFPGRRVNKTLPHGRRSFNLIEVMIDEDQFRKESKKLAA  
LLADPEVEGIYETKVPPEFNAILQIGCVCKVDKSTKKRNTQDG  
WNLSELHMKTTAECPYLEQSVSFFYLYHSISDVRAIYIGYFPT  
SRTVTVVVSPHQHRELSPSILEKQFREACRTLSTELPPGVRI  
TFKVEYVGYVKDAEKILQRAISEYRHEHYGPTVAVIECPNSHS  
LRLGLRVLNDFPCVSIPPNARDSKYQVLGWQQNAAKIGMQRCA  
ASSQWFNERISLARYAHVPLGNFEPDWLMFTADVFFSRALHDQ  
QQILWISDDGVPDLGGTSEEDCFADDEVHQPVLTYPGAYRKVS  
VELKIHHL SVNALLKSNQVNEMEGGGLFGFDQDMNSGPYNNEL  
CGFDETTSSAPAFRVLKQLIQRCLTDAVTSGNVFADAILQHLY  
RWLCSPHSLKHDPVLHRILHKVMQKVFAMLLAEFRKLGAIIIF  
ANFSKVIIDTGKFDLSAAKAYCDSLLKALQTRELFIEWIELEPV  
HFWHSLLFMDQYNYGGIPARADESLDDDSQVDIVSSWNIAEYL  
PKEIQDHFVLVSEFMYIPWKHAQKLAASRASLQEGSSCTPSI  
TVAAAENFESHIVQYVKGEISSYFTGKLLSIVRDAIHHMKKMN  
NDQHNSPGVMQTAANIHKVDAPLEFIKHVCAAFALDQNVQHDV

LVMRKNLLKYVRVREFAPEAEFRDPCPSFILPNVICSYCND CR  
DLDLCRDMALLAQDWHCAMPQCGQPYDREVMENALLQIVRQRE  
RLYHLQDLVCIRC NQVKA AHLAEQCACAGSFRCKEDASDFRSM  
MQIFLNIANRQGFQLLQECTSWILEVQ

|                                                                                |                |       |      |      |                                                                                                                                                                                                                                                                                                                                                                                                                                                                                                                                                                                                                                                                                                                                                                                                                                                                                                                                                                                                                                                                                                                                                                                                                                                                                                                                                           |
|--------------------------------------------------------------------------------|----------------|-------|------|------|-----------------------------------------------------------------------------------------------------------------------------------------------------------------------------------------------------------------------------------------------------------------------------------------------------------------------------------------------------------------------------------------------------------------------------------------------------------------------------------------------------------------------------------------------------------------------------------------------------------------------------------------------------------------------------------------------------------------------------------------------------------------------------------------------------------------------------------------------------------------------------------------------------------------------------------------------------------------------------------------------------------------------------------------------------------------------------------------------------------------------------------------------------------------------------------------------------------------------------------------------------------------------------------------------------------------------------------------------------------|
| Thyroid<br>adenoma-<br>associated<br>protein homolog<br>[ <i>C. sinensis</i> ] | XP_006482571.1 | 249.5 | 69.8 | 0.5% | <p>MSAKWRALQHRHRYTYSAVVFPTSLTESLTQIPSSQNSSFSKF<br/> HNAFRELVSLNSIYAQVNHAKKFASSFIELLSSANAADEWVL<br/> SKATRVYLEVMFLENSLPLHRTLVSALAKERKFQALIVSCFRD<br/> LCDEYGGGGRASDQNKRFCVSRVLSVMSLPKLGYLMDVIQDC<br/> AVLVAWDVLGLNGVVLETQEWARPSPIVMEQCQEALSCLYYL<br/> LQRCLDKFKGLSGQKESIMEMIFVVLISILKSTAFSRDCYVAA<br/> GVALCAALQVCLGPQELGLFLIEGIFYQKTCFSSEKSKSEFE<br/> DALQVCFRKTPTFNGDVCSEIHNFVLSRLCLIRGILTAVSRNV<br/> LNALFFVSKEDLSNGSENGDDSAKTILYNGILPELCSYCNPT<br/> DSHFNFHALTVLQICLQQIKTSILANLTNVSFDDYDPIPEDMGT<br/> RILRIIWNLEDPLSQTQVHLVFDLFDISSLRWVDVGSR<br/> IKSFLQKIASDLLCLGPRCKGRYVPLALLTKRLGAKTLLGMSP<br/> DLLSEIVNAYIDDDVCSAATSFLKCFLECLRDECWSSNGISRG<br/> YAVYRGHCLPPFLYGLASGVSKLRSNLNTYALPVLLDMDVDGI<br/> FPMLAFVSVPSEEENGLSYPELDCSSIELKVEQQVAVFVSLL<br/> KVSRLALAEGDIDLWKNSSVLRTGSKFVTEGSNLYALVCIKG<br/> INFKVLVDWLVLALTHADELLRVDAAESLFLNPKTASLPShLE<br/> LTLMKEAVPLNMRSCTAFQMKWTSLFRKFFSRVRTALERQFK<br/> QGSWRPVVSCENS DRTLINGTDTVSKAENLFKFMRWLSCFLF<br/> FSCYPSAPYKRKIMAMELILTMMNIWSIAPPQEKLDVSLESS<br/> LYPYNKGITAPNSTLLLVGSIIDSWDRLRESSFRILLHFPSP<br/> PGISSEGMVQKVITWSKKLVCSPRVRES DAGALALRLIFRKYV<br/> LDLGWIVRASVNVVCLHPQPQQLKGEQICKSSAPVVEYIKSL<br/> IDWLEVAVKEGERDLESCENSFVHGILLALRYTFEELDWN<br/> AVLSGYSEMKALEKLELVMRITSLALWVVSADAWCLPEDMD<br/> DMIIDNLLLDVPEEMDEPLRSLEDEEKNKPAQDVRTSEQVV<br/> MVG CWLAMKEV SLL LGTIIRKIPLINSSSDTVDSGSGTSDAA</p> |
|--------------------------------------------------------------------------------|----------------|-------|------|------|-----------------------------------------------------------------------------------------------------------------------------------------------------------------------------------------------------------------------------------------------------------------------------------------------------------------------------------------------------------------------------------------------------------------------------------------------------------------------------------------------------------------------------------------------------------------------------------------------------------------------------------------------------------------------------------------------------------------------------------------------------------------------------------------------------------------------------------------------------------------------------------------------------------------------------------------------------------------------------------------------------------------------------------------------------------------------------------------------------------------------------------------------------------------------------------------------------------------------------------------------------------------------------------------------------------------------------------------------------------|

DDLMTMSDAMLDLKQLEKIGNHFLEVLLKMKHNGAIDKTRAGFTALCNRL LCS  
NDLRLCRLTESWMEQLMERTVAKGQIVDDLRRSAGIPAAFIALFLAEPEGAPKKLL  
PQALRWLIDVANRSLDLIENKGAKTTMCEFHSNQETESAVPPDIY  
ATWNSSKIRDEGVVPTVHAFNILRAAFNDTNLAADTSAFSAEA  
LIISIRSFSPYWEIRNSACLAYTALIRRM LGFLNVQKRESAR  
RALTGLEFFHRYPSLHPFIFNELRVITELLGNASSGQSASNLA  
NVVHPSLCPMLILLCRLKPSALAGESGDDLDPFLFMPFIRRC S  
TQSNLKVRVLASRAL TGLVPNEKLPDVLLNIASELLCVEDQNE  
AAPVSSLRGTHRASFNLIHGILLQLGSLLDANC RNLVDFS KKD  
QILGDLIKILGNCSWIANPKMCPILNASFLKVLDHVLSIAR  
TCHTSKSFSTVRNLLLELSTDCLDVDASYGLTYDPTITELRK  
KAANSYFSCVFQASEESGEEVLQLPQRCS PVDSTSSKIPDMEN  
TFSGLLERLVRSLSDSSYEVRLSTLKWLLKFLKSTESDREVCE  
LSSYEIKSIQNWTKNNLQATLMSRLELEKNPRCTNYVLRL LFT  
WNLLQFQKLGSNVCTETIFVGSVDCDSVFQFWDRLMSSYELTR  
HAKIKESLINCMAICIRRFANLFTSSILVDARKKTIEISESDH  
LGRSAHLFACITAFVNIINRHSSSSEPVNMRKAATGSIVASGL  
LEQADLIGSYVSNHQIPSENSSLHFEPQEAGNMYAHQVLVIWF  
TCIKLEDEDDGIRQRLAIDVQKCFSLKRFGSSSHGVPNQVEK  
VIELSFEHLSSIFGCWIEYFDYLCQWVLVAASHVVSGGDLVRR  
VFDKEIDNHHEEKLLISQICCSQLEKIPILKSWVADSLNKDHA  
RNYLLGWRQRFHQLM SFAKDHGRKYEGVDWIGGVGNHKDAFL  
PLYANLLGFYALSICIFKVEAEDEMHLSDVVELGRIISPFLR  
NPLVGNLYLLVVKLHEKQTGATADHTVEFRADMIWDGFDPYFL LR

|                  |                |       |      |    |                                               |
|------------------|----------------|-------|------|----|-----------------------------------------------|
| Probable disease | XP_006465371.1 | 102.9 | 38.4 | 1% |                                               |
| resistance       |                |       |      |    |                                               |
| protein          |                |       |      |    |                                               |
| At5g63020        |                |       |      |    |                                               |
| [C. sinensis]    |                |       |      |    |                                               |
|                  |                |       |      |    | MGNLLSSFLSSPESFRSILSYVGGEAKYVWALQVNLDALQAEL   |
|                  |                |       |      |    | DKLIRTKDDLLNKVELVEQQQPRARRTNQVKGWLQRVQETVTK   |
|                  |                |       |      |    | VVDLQNVRDQELDRLCLGGFCSKDLASSYFGKKVVTLTEQVI    |
|                  |                |       |      |    | LLKNERGEIKDIAEMVPEDA AVELALERTVVGQESMLDQVLRC  |
|                  |                |       |      |    | ITDQETNRGIGLYGTGGVGKTTLLKQVNNKFCIEQRQHDFDV    |
|                  |                |       |      |    | VIWGVVSREPCLDKIQDAIGKRIGLSAESWMDKSLEEKALDIS   |
|                  |                |       |      |    | NILSRKKFVLLDDIWQPIDLTELGIPQLSLNVSSKVVFTTRS    |
|                  |                |       |      |    | LDVCGSMEADEKIEVKCLVHDEAWRLFQEKVGEATLRCHSDIL   |
|                  |                |       |      |    | ELAQTLARECCGLPLALKTIGRAMAYKKNPDEWKYATKVLSTS   |
|                  |                |       |      |    | PEKFSGMEENVFARLKFSYDSLPNYIIRSCFLYCSLFPEDYEV   |
|                  |                |       |      |    | YKGDLDIDYWISEGFVDAFDEGYTIIGDLLRACLLEEVDNDNHVK |
|                  |                |       |      |    | MHDVIRDMALWIACKIDKEEENFLVHAGALLTEAPKIKDWEGF   |
|                  |                |       |      |    | KRISLMENNITSLSAIPNCPLRRTLLLYRNRISMITDGFFQFM   |
|                  |                |       |      |    | PSLKVLNLGFNIFLNKLP SGLSSLISLEHLDLSFTVIRELPEE  |
|                  |                |       |      |    | MKALVNLRYLNLEYVYLNRLPLQLLCNFTKLQALRMLGCSNYS   |
|                  |                |       |      |    | GEEEDRVFFKDAEPFMKELLCLENLDLLSFTFDSWHAFETFLT   |
|                  |                |       |      |    | FQKLLSCTESLELTKLYTPMSLNVLPLAYMKHLKNFLIQNCAF   |
|                  |                |       |      |    | EELKIENAVEIQNLVQRGFRSLHTVCISDCSRLKELTWLVFAP   |
|                  |                |       |      |    | NLKNIDVQNCNNMEEIISPGKLSEVSEIKERQNFLAELKFLCL   |
|                  |                |       |      |    | KDLENLESIYFDPLFPQLKEIEVTGCPKCLKLPLDSTRAMGH    |
|                  |                |       |      |    | KIVVKGNIEWWVELQWEDRVTQRVFSTCFDPMEIVF          |



|                                                                                            |                |       |      |      |                                                                                                                                                                                                                                                                                                                                                                                                                                                                                                                                                                                                                                                                                                                     |
|--------------------------------------------------------------------------------------------|----------------|-------|------|------|---------------------------------------------------------------------------------------------------------------------------------------------------------------------------------------------------------------------------------------------------------------------------------------------------------------------------------------------------------------------------------------------------------------------------------------------------------------------------------------------------------------------------------------------------------------------------------------------------------------------------------------------------------------------------------------------------------------------|
| Probable inactive<br>receptor kinase<br>At2g26730                                          | XP_015384636.1 | 68.5  | 55.1 | 2%   | <p>MRGSKLFLFLEGLICIAILPRLFTGCVGGELSESESEFFKFISA<br/> VDSQNVLRIGWNGNLPHPCSYNLKGICNLHATSIVGIRLENM<br/> NLSGIIDAESLCKLRHLRVVSLAKNLIQGRIPNSISNCRRITY<br/> LNLSSNLLSGAVPLALTKLKHLKTLDISNNHFACTSPDNFKQE<br/> IKYFDKYVVTSSSEINRASTVEARGLEDTPPPSVHNMSEHGE<br/> KRHWFRNWMTHIPLAAGIGLVVLIAYCMGKKSQAQIARDREILK<br/> ALQDSPSKSPPRVMDIEEVRPEVRRSELVFFVNENEKFKLDDL<br/> LEATADLRSTICSSLFMVRLKNSAVYAVKRLKKLQVSMDEFS<br/> QTMRQIGNLKHPNPLVLCYNSTNEEKLLVYKYQSNGLSLLSL<br/> EAYIEGKRDFPWKLRLSIATGIAKGLDFIYQKSNEEKTIHPGN<br/> LKLSNILLNENEDPLISECGYSKFLDPKKTCLFSSNGYTAPEK<br/> TVSEQGDVFSFGVILLELLTGKTVEKTGIDLPKWVKAMVREEW<br/> TGEVFDKEVAKAGRQWAFPLLNVALKCVSNPDDRPTMAEVLE<br/> RIEEVVNGNDERDRDHSNSSFSSMESIPHDSCLLHTVIQENWD TPRSSY</p> |
| Squamous cell<br>carcinoma<br>antigen<br>recognized by T-<br>cells 3-like<br>[C. sinensis] | XP_015383384.1 | 113.4 | 53.0 | 0.5% | <p>MEPKEETLATIPEEEEDGDTVIPDVENNPKPTTKDNSSDSSDG<br/> SDSDSDSDSDSDSDSEDAKQSMELQTLQYQLSNEPSNYDTHV<br/> QYIKVLRKMGIEIKLRQAREAMNEIFPLTPAMWQEWARDEASI<br/> STGPEALLGVEKIYERGVSDYLSVPLWCDYLFVQYEDPSIRA<br/> FLPDGISKARNLFERAITAAGLHVSEGSNRETKKMEPKEETLA<br/> TIPEEEEDGDTVIPDVENNPKPTTKDNSSDSDASDSDSDSDS<br/> ESEDEAKQSMELQTLQYQLSNEPSNYDTHVQYIKVLRKMGIEI<br/> KLRQAREAMNEIFPLTPAMWQEWARDEASISAGPEALLGVEKI<br/> YERGVSDYLHMTSIPRPLLLVLQEKEKQVQRIRSFHRQLSVP<br/> LANSSATLLAYKSWEVEQGAVLDVESSNLDGDSNNVALAYQKA</p>                                                                                                                                                                                                             |

|                                                 |            |      |      |    |                                                                                                                                                                                                                                                                                                                                                                                                                                                                                                                                                                                                                                    |
|-------------------------------------------------|------------|------|------|----|------------------------------------------------------------------------------------------------------------------------------------------------------------------------------------------------------------------------------------------------------------------------------------------------------------------------------------------------------------------------------------------------------------------------------------------------------------------------------------------------------------------------------------------------------------------------------------------------------------------------------------|
|                                                 |            |      |      |    | LEMCNARAHLEEQISRQDLSDEKFQQYMIYLKYEQSSGDPGR<br>VQLLYERAITDFPVSSDLWLDYTQYLDKTLKVGNNVRDVYSRA<br>TKNCPWVGELWVRSLSLERSRASEEEISTVFEKSLLCAFSTF<br>EEYLDLFLTRIDGLRRRILFSGEVEGVLDYSLIRETFQRASDY<br>LSEQMKNTDGLRLYAYWAHLEQSMGKDMVSARGVWERLLKIS<br>GAMLEAWQSYISMEIELGHINEARSIYKRCYSKRFTGTGSEDI<br>CHAWLRFEREYGTLEDFDHSVQKVTPRLEELQLFRSQQESKSL<br>PESADQKEHSVKKTGREKRKSDLNISYEQSPAKRQKNAPQKPK<br>KVHDKKQQVQNLAENEGRETKQTVEEQPKEQPIKDAVPGR<br>KGFTDECTAFLSNINLKATYEDLRRFFSDVGGVSSIRILHDKF<br>TGKSRGLAYVDFIDDEHLAAAVAKNKQMFLGKKLSIARSNPKQ<br>RKDSSGERAPTEQAQSHQQTGNAGTSASKESSIETSKQSRGRG<br>DSVQLKGKNTFAVPRNVRPLGFPAIKPKTEEGEDLKPKSNDEF RKMFIKKD |
| MYB<br>transcription<br>factor<br>[C. sinensis] | AMH40451.1 | 36.6 | 67.4 | 4% | MGRAPCCEKIGLKKGRWTAEEDEILTKYIRANGECSWRSLPKN<br>AGLLRCGKSCRLRWINYLRADLKRGNITAE <del>EEEE</del> TIVKLHSSLG<br>NRWSLIAAQLPGRTDNEIKNYWNSHLSRKTFSTGPADDPLTS<br>DDLSNNGIKLAGGCKQRKGRTSKVNSKKHKLALASIGMPKTKR<br>GTISEVLDQQVTADENKSSIGQVSCMASDEFFCGEASSDQASG<br>LCLSKDIESEVLGPYEWLDSEIKRVNSNLNREKASAEDEVKRD<br>QDKMAKSAEKESVFWGSNEDELLYTFDPTMMNCSGFDEEWLDF<br>DWAAGGAECHNQCELRDGD <del>DD</del> KLLCWLWD <del>SG</del> N <del>GE</del> GCQ                                                                                                                                                                                                 |

|               |                |      |      |    |                                              |
|---------------|----------------|------|------|----|----------------------------------------------|
| Protein       | XP_006488076.1 | 84.1 | 31.2 | 1% |                                              |
| ENHANCED      |                |      |      |    | MDNSQITSQGRMEGWLHLIRSNRIGLQYSRKRYFLEDHFLKS   |
| DISEASE       |                |      |      |    | FKSVPHSKNEDPVRSIIIDSCIRVTDNGRESIHRKVFFIFTLY  |
| RESISTANCE 2  |                |      |      |    | NTSNHNDQLKLGASSPEEAAKWIHSLQEAAALKGGPHQGVGDHI |
| [C. sinensis] |                |      |      |    | GCPNSPWESFRLSGSSRASHTKSIDWTLCSGTHMEQVTADVIA  |
|               |                |      |      |    | PSPWTIFGCQNGLRLFKEGKDRGSRGKWDDHPAIMAVGVVDGT  |
|               |                |      |      |    | SEAIQTLMSLGASRSVWDFCFYRGCVVEHLDGHTDIIHKQLY   |
|               |                |      |      |    | SDWLPWGMKRRDLLRRYWRREDDGTYVILYHSVFHKKCPRQK   |
|               |                |      |      |    | GSVRACKSGGYVITPMNHGKKSVMKMLAIDWKCWRSYLQPS    |
|               |                |      |      |    | SARSITIRMLGRVAALRELFRAKQGNYSPEFLSGELTRNMRM   |
|               |                |      |      |    | HQTDGNMVQMPTEDGNSKENTSEEVDQVSSEHASLVGLNDAAD  |
|               |                |      |      |    | EFFDVPEPSDYDDSENGWTSDFGPEMNSQDTRHPKISTAAGFV  |
|               |                |      |      |    | RKLHDLAVQKRGYVDLQGTAKEDNFSCCYGTTLQKDPTCTLPC  |
|               |                |      |      |    | SWTSTDPTFLIRGKNYLQDRHKVKAKGTLMQMVAADWLKSDK   |
|               |                |      |      |    | REDDLGGRPGGIVQKYAEQGGPEFFFIINIQVPGSTTYSALY   |
|               |                |      |      |    | YMMTPVKDAPLLESFINGDDAYRNSRFKLIPYISEGSWIVKQ   |
|               |                |      |      |    | SVGKKACLIGQALEINYFHGKNYLELGVDIGSSTVARGVVSLV  |
|               |                |      |      |    | LGYLNNLVIEMAFLIQANTEELPEFLLGTCRLNHLDAAKAVL   |
|               |                |      |      |    | LKPSSRLSSSSQGPVRN                            |

|                                                                                     |                |      |      |      |                                                                                                                                                                                                                                                                                                                                                                                                                                                                                                                                                                                                                                                                    |
|-------------------------------------------------------------------------------------|----------------|------|------|------|--------------------------------------------------------------------------------------------------------------------------------------------------------------------------------------------------------------------------------------------------------------------------------------------------------------------------------------------------------------------------------------------------------------------------------------------------------------------------------------------------------------------------------------------------------------------------------------------------------------------------------------------------------------------|
| Hypothetical<br>protein<br>CISIN_1g001123<br>1mg, partial<br>[ <i>C. sinensis</i> ] | KDO77096.1     | 64.2 | 57.9 | 1.5% | DLWSGSEGGGIKWPWEAIEKALSLKPEERHTAALIVERSYID<br>LRSHLSVNGFSSILTS DIKNLLSDHSRAKVWSAGFLSFALWDA<br>RTRELLKVFNIDGQIENRVDMSELLPDFAMEDEFKTKIVTSSKK<br>DKAQSSFQFFQSRNAIMGAADAVRRVA AKGGFGDDNRRTEAL<br>TTSIDGMIWTGGANGLLLQWDPNGNRLQDFQYLPFAVQCLCTF<br>GSQIWVGYMNGIVQVLDLEGNLLGGWVAHSSPVIKMAVGAGYI<br>FTLANHGGIRGWNVTSPGPLDSILCKELAGKEFLYTRMENLKI<br>LAGTWNVGQGRASQDALISWLGSASDVGIVVVG LQEVMGAG<br>FLAMSAKETVGLEGS AVGHWWLDMIGKILDDGSTFERVGS RQLAGLLIAVWVRK<br>NLKDYVG DVDA AVPCGF GRAIGNKGAVGLRVRVYDRIMCFVNCHFAAHLEAV<br>NRRNADFDHVYRTMTFCRPSN<br>LCSAAAAGASSVVQMLRSTNPLSGLTVEGVPELSEADMVIFLG<br>DFNRYRLDGITYDEARDFISQRCFDWLRERDQLRAEMEAGNVFQ<br>GMREADIKFPPTYKFEKHLA GLAGTL |
| Oleosin 18.2 kDa<br>[ <i>C. sinensis</i> ]                                          | XP_006470260.1 | 17.1 | 46.9 | 7%   | MAERDRPQPHQLQVHPQQHSLIGQRGAAGGGPSASKVLAVL<br>AMLPLGGTFLALAGVTLTGTHGLCVTTPLFIIFSPVIVPAAI<br>VLALAVTGFLTSGAFGLTALSSLSWVLSILWQKTGSVP EMADQ<br>AKKRVAGIADYVGQKTKEVGQDIQSKVHEAGGKTGR T                                                                                                                                                                                                                                                                                                                                                                                                                                                                                  |

|                                                                                    |                |       |      |      |                                                                                                                                                                                                                                                                                                                                                                                                                                                                                                                                                                                                                                                                                                                                                                                                                                                                                                                                                                                                                                                                                                                                                                                                                                                                                                                  |
|------------------------------------------------------------------------------------|----------------|-------|------|------|------------------------------------------------------------------------------------------------------------------------------------------------------------------------------------------------------------------------------------------------------------------------------------------------------------------------------------------------------------------------------------------------------------------------------------------------------------------------------------------------------------------------------------------------------------------------------------------------------------------------------------------------------------------------------------------------------------------------------------------------------------------------------------------------------------------------------------------------------------------------------------------------------------------------------------------------------------------------------------------------------------------------------------------------------------------------------------------------------------------------------------------------------------------------------------------------------------------------------------------------------------------------------------------------------------------|
| Uncharacterized<br>protein<br>LOC102613021<br>isoform X1<br>[ <i>C. sinensis</i> ] | XP_006468109.1 | 267.3 | 34.6 | 0.5% | MTDKNPSRRELLDRWRGIEEEEELDDGNDPLKRRRIDGLKEKW<br>FADAFNFLIGLPEKNHIWCGSWDIMGPYLELFYNYFKDECHDS<br>PLRLLWKRISGEMQHCIQCVSQHHQAQEMYSMEYESGVIGPLL<br>DVLRLSDEERVTKYLREINARLAHQEYYPQIDNNQVICIMYEV<br>LMFPVLLDDQSLFTEFETFIEAVDNMHELALDGHQLFPGVFAL<br>FFFNRRVRTIGRRLARSMGKLRRATDLEPMQPLLKKFIGFLET<br>EVLTSFKTSRPRARLKRLPIWLGITSLLEFLEPPALEEGILE<br>RYPIFFDTVLNHISGDSPEFSHAVSCLRELFKMLGYKLWLRST<br>LSPSVMRNTLLGQC FHTRSEKIHKDIFDLFPPFLQSLEALQDG<br>EHEKQRRHFLYFLLYQVPVSSNFSVLTAQMACKISLLIHRGY<br>KMNPPCPPFECAHMGWGPFLVSSLDSSLHSSLRQPAFDLIQTI<br>IVSDAAALVTSVLKSARPLRTETIISVEMNEDEDDLKFPFDPD<br>VDEKDDNSSWNEFTAQSRITSQEFRVWMCIPMLWIDVLVDINP<br>SVLPVSFSKVVFWARSHFSIVEPEISAEMALDVRAWLSSSATE<br>ISSTFGWKAPTGCDDGGAGKVSKNSMEVSTMCLPLIRAFKRLT<br>AHFIVQIGQGELRKQWTWEPRMGESLILSLVDPNDNVRRQFGKC<br>ILEQVSNTRGLASGLKFLSSSTSSLSTIFLGLKHALKLVQLDS<br>VLLKFQSLHHFFVLRKIFEEGHLPKCDLLKSSSGHSSITMFS<br>SQGGFLRQPQFESFDANTGCSSNIDLKLWEKFHYTLSEITWPS<br>VKRCLQEGKTFLDYSLCQMT CIRVLEILPVVFGKVCPLLAELS<br>GYSATTMQNVFDFKWLHDLVDWGKSQLKVIVYWKRTITCLLN<br>LLKDSCSGTSLLT VSSIENLISSDHLDMDGLVEKVSLLCVSL<br>KESSRNSGKTLMSMAHFPEDLSVERKSATLDIRPFPVKDMDVE<br>ILDSETIASKSKDNLIVVSDDETEKEPSVDQGLLSDFKSRQCV<br>VVSKTGAPISDKRASQTESLKNRVSILDSSKDLLDGSGPASP<br>QVLDES VGKSLNSLDSKVVDGKKKESNSKFNASDSLFSQNRVG<br>LRNKPVESSEFKNVNQASTNVVAKPTNKLLKELVCDVENDPLE |
|------------------------------------------------------------------------------------|----------------|-------|------|------|------------------------------------------------------------------------------------------------------------------------------------------------------------------------------------------------------------------------------------------------------------------------------------------------------------------------------------------------------------------------------------------------------------------------------------------------------------------------------------------------------------------------------------------------------------------------------------------------------------------------------------------------------------------------------------------------------------------------------------------------------------------------------------------------------------------------------------------------------------------------------------------------------------------------------------------------------------------------------------------------------------------------------------------------------------------------------------------------------------------------------------------------------------------------------------------------------------------------------------------------------------------------------------------------------------------|

SSFKSGKHQQTYLTKSGPFVPKRQVIQLK  
SPFENRCGLHRMETGVKRFGPPKLDDWYKPILEIDYFATVGLA  
SSREDENRVHCKLKEVPVCFQSPEQFVSIFRPLVLEEFKAQLH  
SSFLEMSSWEDMYYGSLSVLSVERVDDFHLVRFVHDDNDSVTS  
KIFSENDLVLLTRVSPQKTPHDVHVMVGKVERRERDNNRRSSIL  
LIRFYLQNGSVRLNQARRNLLERSKWHATLIMSITPQLREFHA  
LSSLKSIPLLPILNPVNVSRGYNESREPDLGKLSQLQQILKT  
SFNESQLQAISVAIGLSSSWKKDCELSLIQGPPGTGKTRTIVA  
IVSALLATRTSPKSHLKQNYSSCINSRPKIGQSAAIARAWQDA  
ALARQINEDSERDKKSSSESVRARVLICAQSNAAVDELVSRI  
KEGLYGSDGKTYKPYLVRVGNVKTVHPNSLPFFIDTLVDHRLA  
EERMHLTDPKNEFCTRSSTLRNLEKLVDRIFFEAKRANTKD  
GNSDPKNMLDDEVHKGDDVKLSDVELEAKLRKLYEQKKQIYRE  
LGAAQVQEKKSYETKALKHKLRSILKEAIEIVTTLSGCGGD  
LYGVCSESVSGFKFGNPSENTLFDVVIDEAAQALEPATLIPL  
QLLSYGTRCVMVGDPKQLPATVLSNVASKFLYECMFERLQR  
AGHPVVMLTKQYRMHPDICRFP SLHFYENKLLNGEEMSRKSAP  
FHVTGGLGPYVFYDISDGQELRGKNAGAFSLYNEHEVDAAVEL  
LRFKRKRYLSEFVGGRIGIITPYKSQLGLLRSQFSNAFGSSVT  
SDIEFNTVDGFQGREVDILILSTVRAADSSSASSGRSSSIGF  
VADVRRMNVALTRARLSLWILGNARTLQMNYNWAALVKDAKER  
NLVISIKKPYASMFKSMFKSSLRKNHSELQDDHLSQLKHITEK  
HGD TNQFVKQIGRKS RAGVETKTRDIDHMAQC NKAVARDNDTV  
SAKREDLQTSRRRARDQSDLPKTDHPSAAANGQSRTSKSVKSA  
VLGEHVL DSETRGEESGKKKFSSSNTLTDQKKDEYSKSKLDQS  
APLDQQKDKYSKGKSDHSGHEAGNSHKHSKFKVSKGSSKSFEQ  
DRSLKKLK **GSDPSTGGSQK**EQEANDQGRNPNSVGS SDALIAKR

KQQREAVDAILYSSLISSKKPEPVKPAPTKRSLSPSTSIAGGGI  
RPPKRKKVPAASSESALQDQ

Uncharacterized    XP\_006488053.1    79.7    26.1    1%  
protein  
LOC102616627  
[*C. sinensis*]

MSHPQQLRRALNQPLEPDHHESSFLSSHAKASQTSATASSTT  
SRCSSFASKSASYSSNQHQYSSFHHQNLFACTSCIRLNVFSTSS  
KRWSAWFKLHCPGSFMASQQTRLNFMPLDIARRKKISRQKK  
EELQREVSMLQKMLEQEETLHEILERIHNGQDGSAISIPNLP  
PKVKELLAELALVEGEIKRLEGQISQLQLGLKHEQEVTKETKS  
KQWQLGSLGNLQGHSTYMANISSPLINKVGNEKVAFETKALHF  
ISKAIKGDYNLSDFSVNEKKMGNSKVVFVDQKENQFQQQQEVK  
FQDRVPRKSGMIKPASPLRDPRHPTPKPRERNAAEISFDLPPK  
SLSNSILLEESIQNWQPNKLSSESIMKCLNFIYVRLRLTSRAIE  
LEKAGPISRSMHSSITSRSFRADTSLNSKSSIVLQKDSRQQDP  
YGIFDMEESIPRDIGPYKNLVIFSSSSMDPKCISSSSSVPLIR

KLRILMNNLQTVDLKALTYQQKLAFWINMFNACIMHGFLQYGV  
 PNSPEKLIALMNKATLSIGGSTINAQAIEHYILRGQESSNLKE  
 VDQKAGEKDEKEAIVRKLYGLESTDPNVTFALCYGTRSSPAVR  
 IYTADGVIAELEKSKLEYLQASVVVTNTRKIAFPELLFRNMLD  
 FAMDIDTLVEWVCHQLPTSGSLRKSMVDCFRHQGHNGKISIT  
 VEKIPYDFEFQYLLAI

Uncharacterized protein  
 LOC107177306  
 [C. sinensis]

MMKIPYADHFPGHITSMCKLDVIVNAIREKLTRQQQLQLFK**DNI**  
**FGHFLRCR**SYPFSGVIVHNLLLRQVSHGDGNDKDDLWFQVGDH  
 LIRLSIGEWCLVTGLCCGEKVFLTKHKTKHRLLNKYFGGRNRD  
 INLGQFEEIFMNLHFKTMNDTDALKIAMFYFADRVLHGRKDKH  
 QINFNLLNEVDDINHFRSIPWGRLSWETIYKSIDNVLNGKAKK  
 FKKASAENPLHRIEKYNFYGFTSAVHAWIFEAIEGLPLEWVEK IRRKASFIPPPKT

Phospholipase A1-Sigma 3,  
 chloroplastic  
 [C. sinensis]

MAPNLLSFSSPKGVFPFLPQQYRYYNKKAKTSLLYLNNLTNVS  
 SLNSKNLLKCSSVSNLSTPPLDETAFDHQQEEEEQEQQEKEK  
 ELHEMWKAIQGCNDWQGLDPMNCHLRKEIIRYGEFSQACYDS  
 FDFDPHSKYCGTCKYSAASFFKKLDMADSGYQISRYLYATSNI  
 NLPKFFQKSRLSSVWSTYANWMGYIAVTTDEEEKRLGRRDIV  
 VAWRGTVTYIEWIYDLKDILHTANFGSDPSIKIELGFHDLYTK  
 KEQSCNYCTFSAREQVLAIEIKRLIEYEGEEISITFTGHSLGA  
 ALAIVSAYDVAELGLNIVNDGESSSTKKIPITVYSFAGPRVG  
 NLKFKERCEDELGVKVLRVVNVHDKVPTVPILANEKFQFQKHF



|                                                                        |            |      |      |      |                                                                                                                                                                                                                                                                                                                                                                                                                                                           |
|------------------------------------------------------------------------|------------|------|------|------|-----------------------------------------------------------------------------------------------------------------------------------------------------------------------------------------------------------------------------------------------------------------------------------------------------------------------------------------------------------------------------------------------------------------------------------------------------------|
|                                                                        |            |      |      |      | EEATKFPWSYAHVGVELALDHTNSPFLKNTKDFGCAHNLEALL<br>HLLDGYCGKENQFCLETTKRDIALVNKSCDFLKSEYEVPPHWR<br>QDENKGMVRNTDGRWVLPERPRLALPEDTAHHLQKVLKNIAN<br>SNNNNNSNSANNSSQLEAI                                                                                                                                                                                                                                                                                           |
| Hypothetical<br>protein<br>CISIN_1g015135<br>mg [ <i>C. sinensis</i> ] | KDO69165.1 | 44.9 | 43.5 | 3%   | MAGICCGVVGSEPAVSVEQSSRASRRRRLRPFNLVADVAV<br>LPPSENVVRKRKKLELYTTLTAAHARENTEQNCEKDSERGRV<br>NKEELVGNNEAADDLVNDNPKFGMTSVCGRRRDMEDTVSIHPS<br>FCKQNCAHFYGVFDGHGCSHVAMKCKDRLHDILREEIESCNV<br>EESVKWKQTMQASFGKMDKEVQDWSVSSKISNCRCELQTPQCD<br>AVGSTAVVAVVTPEKLIVSNCGDSRAVLCRNGVAVPLSNDHKP<br>DRPDELLRIEAAGGRVIYWDGPRVLGVLAMSRAIGDNYLKPYP<br>ISEPEVTVTERTAEDDECLILASDGLWDVVSNETACSVVRTCFR<br>AQKAAAAASPSPGSEVAVSQSSDKACLDASILLTKLALAR<br>RSSDNVSVVVVDLRRIKSQKQGLSS |
| Hypothetical<br>protein<br>CISIN_1g016141<br>mg [ <i>C. sinensis</i> ] | KDO70337.1 | 43.1 | 33.3 | 2.5% | MGNAVGCVSAGVKAPKKASSYGFPFPLFSSFHGRPRNALQSS<br>SSSSRNKKQKRERIQVDEGSAITSEQALPAALPFHSDQTSSSI<br>PFSRSTSVVHPSLGSKKQSFQRSSSARRRSNNDPLIKRPHQLV<br>NQEPKIESPETSHFVLVHGGGFGAWCWYKTMTLKESGFKVDA<br>VDLTGSGVSSCDTNSITSLEQYVKPLIDTFNELGNEEKVILVG<br>HDFGGACISYVMELFPSKVAKAVFIAATMLTSGQSALDTISQQ                                                                                                                                                                      |

|                                                                 |                |       |      |    |                                                                                                                                                                                                                                                                                                                                                                                                                                                                                                                                                                                                                                                                                                                                                                                                                                                                                                                                                                                                           |
|-----------------------------------------------------------------|----------------|-------|------|----|-----------------------------------------------------------------------------------------------------------------------------------------------------------------------------------------------------------------------------------------------------------------------------------------------------------------------------------------------------------------------------------------------------------------------------------------------------------------------------------------------------------------------------------------------------------------------------------------------------------------------------------------------------------------------------------------------------------------------------------------------------------------------------------------------------------------------------------------------------------------------------------------------------------------------------------------------------------------------------------------------------------|
|                                                                 |                |       |      |    | MGSNDLMQQAQIFLYANGKQNPPTSIDLDRDLLFNRSAA<br>KDVELALISMRIPIFAPVLEKLSVSDNYGSVPRFYIKTLQDC<br>AIPVSVQEAMINSNPPELVFEIKGSDHAPFFSKPRALHRILVEISKITHR                                                                                                                                                                                                                                                                                                                                                                                                                                                                                                                                                                                                                                                                                                                                                                                                                                                               |
| Putative disease<br>resistance<br>protein RGA3<br>[C. sinensis] | XP_006492568.1 | 109.9 | 38.8 | 1% | MVDAIVSPLEKLISFSVKEVTQQVKLVKGVQDEVEKLTIHLQ<br>MIHAVLNDAEQRQVKEKSVRLWLGRLKDVSYDIEDVLDEWITA<br>RRKLQMKQNGHFPQKQVCSCSPASSIGFEKIILRPDIAVKIKE<br>INEKLDAIATQKYIFKFVENGSNSTREPRGRAQSTSLIDEEEI<br>CGRVDEKNELLSKLLCESSDSPKGLHIISIIGMGMGKTTLAQ<br>LACNHEEVKRKFDKILWVCVSETFEEFRVAKAIVEALDGHESR<br>LGEFQSLIKHIYESVAGMCFLLVLDDVDGNYMKWEFFHCL<br>KNGLHRSKILVTTRKKSVASMMGSTNIISIKELTEEECRLLFN<br>KIAFSDRPIEEREKLEQIGRKIANCKKGLPLAAKIIGSLMRSK<br>ETEEEWRRILNSGLWKVEEIEKDILSSLLSYNDLPSKVKKCF<br>SYCAIFPKDYNIEKDRILITLWMAQGYLDTEQDEEMESKGEEYF<br>GILASRSFFQEFTKSYDNCIMQCKMHDMVHDFGQFISQNECLS<br>MEISGLNAINSFDEKVRHLLLVGNGASFPVSTCGVKKMRSLI<br>IDYSRYFHLYLNGKILERLFRESTSLRVLEFGDWARSLLQGP<br>LTRIPRNIERLVHLRYLNLSNQSIRKLPDTLCELNYLQKLDIS<br>CCCKLKELPQGIGKLINMRHLLNYGTISLRYMPVGIGRLTSLR<br>TLDEFYVSGGGGIDGRKACRLESLSLELLQVCGIRRLGNVTD<br>VGEAKRLELDKMKNLSCLKLLFNKEEGDGQRRKNEDDQLLEF<br>LQPPPNLRKLLIGSYRGKTVFPPWMMSLTNLRSLDLDDCENCE<br>KLPLGKLPSEKLSISFMCVSRVDNEILGIESDHHDSSSCS<br>SSSVTIAFPKLSLTISWMLELEDWDYGIAGTGNAFISIMPR |

LSSLTFDSCPCLKALPDHFHQTTTLQEFNIGWNCGLLEKRYRK  
 GEGEDWHKISHIPNLEIGP

Hypothetical  
 protein  
 CISIN\_1g038912  
 mg, partial  
 [C. sinensis]

MFRTSRISFLPDELLSEILARVGACSLDDLLNAGLSCKLFNEI  
 TFDKYVLRQASIEKIPAMPWHKNYSFLEKCRDSGNPEALYKQG  
 VVEFFSYSNLEAGVAYLDIATKSGHLGASYILGVIFLCKDDED  
 DDNESNQKGMQHLDKVYRAKRLSQCRNKLQSITQTLWKNNYLK  
 PKLNKCPSRKNHGLKVGWPCEVDDIEL

Hypothetical  
 protein  
 CISIN\_1g037051  
 2mg, partial  
 [C. sinensis]

MRKLEHGELKATFPKIVFNPSFEDEEEKCMDITTVQRSTMSRLSPEETSDLTGSKERKA  
 EPVRQNPTLPPPASVRLLTQPPPPPPPP PPSVNHPSQATLPPIR

Glyceraldehyde-  
 3-phosphate-  
 dehydrogenase  
 GAPC1,

MAGDKKIKIGINGFGRIGRLVARVVLQRDDVELVAVNDPFIST  
 DYMTYMFKYDSVHGQWKHNELKVKDEKTLFGEKPVAVFGRN  
 PEEIPWAKTGAEYVVESTGVFTDKDKAAHLKGGAKKVVISAP  
 SKDAPMFVVGVNEKEYKPELDIVSNASCTTNCLAPLAKVIHDK

|                                                                                   |                |      |      |    |                                                                                                                                                                                                                                                                                                                                                                                                                                                                                                                                                                                               |
|-----------------------------------------------------------------------------------|----------------|------|------|----|-----------------------------------------------------------------------------------------------------------------------------------------------------------------------------------------------------------------------------------------------------------------------------------------------------------------------------------------------------------------------------------------------------------------------------------------------------------------------------------------------------------------------------------------------------------------------------------------------|
| cytosolic [C.<br><i>sinensis</i> ]                                                |                |      |      |    | FGIVEGLMTTVHSITATQKTVDGSPMKDWRGGR <b>AASFN</b><br><b>IIP SSTGAAK</b> AVGKVLPALNGKLTGMSFRVPTVDVSVVDLTVR<br>LEKEATYEEIKNAIKEESEGLKLGILGYTEEDVVSTDFVGDSR<br>SSIFDAKAGIALSKNFVKLVSWYDNEWGYSSRVIDLIVHMAKT QA                                                                                                                                                                                                                                                                                                                                                                                       |
| Uncharacterized<br>protein<br>LOC102621728<br>isoform X4 [C.<br><i>sinensis</i> ] | XP_015389051.1 | 16.3 | 34.1 | 7% | MANVESDSTPSVPKKENITPVG SKIAELNESRAELLNRIQGLK<br>QDLQNWRSKLDTQVKIYRDELTDMKK <b>TL SVEVEQLR</b> SEFQELR<br>STLQQQQDDVTASLRNLGLQDFSGDDKERKDDPNINGKDEEVH<br>AIATPVEDNAKADDDK                                                                                                                                                                                                                                                                                                                                                                                                                      |
| Hypothetical<br>protein<br>CISIN_1g037790<br>mg [C. <i>sinensis</i> ]             | KDO60176.1     | 79.7 | 26.1 | 1% | MSHPQQLRRLALNQPLEPDHHESSFLSSHAKASQTSATASSTT<br>SRCSSFASKSASYSSNQHQYSSFHHQNLFCTSCIRLNVFSTSS<br>KRWSAWFKLHCPGSFMASQQTRLSFNMPLDIARRKKISRQQKK<br>EELQR <b>EV SMLQK</b> MLEQEETLHEILERIHNGQDGS AISIPNFLP<br>PKVKELLAELALVEGEIKRLEGQISQLQLGLKHEQEVTKETKS<br>KQWQLGSLGNLQGHSTYMANISSPLINKVGNEKVAFETKALHF<br>ISKAIKGDYNLSDFSVNEKKMGNSKVVFVDQKENQFQQQQEVK<br>FQDRVPRKSGMIKPASPLRDPRHPTPKPRERNAAEISFDLPPK<br>SLSNSILLEESIQNWQPNKLSSEIMKCLNFIYVRLLRTSRAIE<br>LEKAGPISRSMHSSITSRSFRA DTSLNSKSSIVLQKDSRQQDP<br>YGIFDMEESIPRDIGPYKNLVIFSSSSMDPKCISSSSSVPLIR<br>KLRILMNNLQTVDLKALTYQQKLA FWINMFNACIMHGFLQYGV |

PNSPEKLIALMNKATLSIGGSTINAQAIEHYILRGQESSNLKE  
 VDQKAGEKDEKEAIVRKLYGLESTDPNVTFALCYGTRSSPAVR  
 IYTADGVIAELEKSKLEYLQASVVVTNTRKIAFPELLFRNMLD  
 FAMDIDTLVEWVCHQLPTSGSLRKSMVDCFRHQGHNNGKISIT  
 VEKIPYDFEFQYLLAI

Penta  
 tricopeptide  
 repeat-  
 containing  
 protein  
 At5g04780,  
 mitochondrial-  
 like  
 [*C. sinensis*]

XP\_006467747.1

105.9

48.4

1%

MIHKWNMKNFFENSLQKNLHQRIYLPFKKPFQKTHSKYIQ  
 TATIISENPESTSNLNVTHDSNFTPTSIPYSKLLSQCTISK  
 SVNLGKEIHAHLIRFGLLKDPKNKNNLINFYAKLQFFLYARKL  
 VDESPEPDLVSWALISGYAQNGR**GEEAALAFQK**MHLLGLKCN  
 EFTFPSVLKACTSKKDLFLGLQVHGIVVFTGFDSDEFVANSLV  
 VMYAKCGNFIDSRRLFDAIPERSVVSWSLFCYVHCDFFLEEA  
 VCFFKEMVLGIRPNEFSLSSMINACAGSGDSSLGRKIHGYSI  
 KLGYSDFMFSANALVDMYAKVGNLEDAVAVFKDIEHPDIVSWN  
 AVIAGCVLHEHNDWALKLFQQMKSSSEINPNMFTYTSALKACAG  
 MELKELGRQLHCSLIKMEIKSDPIVGVGLVDMYAKCGSMDEAR  
 MIFHLMPEKNLIAWNIVISGHLQNGGDMEAASLFPWMYREGVG  
 FDQTTLSTVLKSVASFQAIGVCKQVHALSVKTADESDDYIVNS  
 LIDAYGKCGHVEDAVQIFKESSAVDLVACTSMITAYAQFGLGE  
 EALKLYLEMQDREINPDSFVCSSLLNACANLSAYEQGKQVHVH  
 IIKFGFMSDTFAGNSLVNMYAKCGSIDDADRAFSEIPDRGIVS  
 WSAMIGGLAQHGRGKEALQMFGQMLEDGVLPNHITLVSVLCAC  
 NHAGLVAEAKHHFESMEKKFGIQPMQEHYACMIDILGRAGKFQEAMELVDTMPF  
 QANASVWGALLGAARIYKNVEVGQHAAEMLFA  
 IEPEKSSTHVLLSNIYASAGMWDNVAKVRRFMKDNKLKKEPGM

MRGSKLFLFLEGICIAILPRLFTGCVGGELSESESSFFKFISA  
VDSQNVLRIGWNGNLPHPCSYNLKGICNLHATSIVGIRLENM  
NLSGIIDAESLCKLRHLRVVSLAKNLIQGRIPNSISNCRRLTY  
LNLSSNLLSGAVPLALTCLKHLKTLDISNNHFAGTSPDNFKQE  
IKYFDKYVVETSSSEINRASTVEARGLEDTPPPSVHNMSEHGE  
KRHWFRNWMTIPLAAGIGLVVLIAYCMGKKSAAQIARDREILK  
ALQDSPSKSPPRVMDIEEVRPEVRRSELVFFVNENEKFKLDDL  
LEATADLRSQTICSSLFMVRLKNSAVYAVKRLKKLQVSMDEFS  
QTMRQIGNLKHPNPLVLCYNSTNEEKLLVYKYSNGSLLSL  
EAYIEGKRDFPWKLRLSIATGIAKGLDFIYQKSNEEKTI PHGN  
LKLSNILLNENEDPLISECGYSKFLDPKKTCLFSSNGYTAPEK  
TVSEQGDVFSFGVILLELLTGKTVEKTGIDLPKWVKAMVREEW  
TGEVFDKEVAKAGRQWAFPLLNVALKCVSNSPDDRPTMAEVLE  
RIEEVVNGNDERDRDHSNSSFSMESIPHDSCLLHTVIOENWDTPRSSY

|                                                                      |                |      |      |      |                                                                                                                                                                                                                                                                                                                                                                                                                                                                                                                                                                                                     |
|----------------------------------------------------------------------|----------------|------|------|------|-----------------------------------------------------------------------------------------------------------------------------------------------------------------------------------------------------------------------------------------------------------------------------------------------------------------------------------------------------------------------------------------------------------------------------------------------------------------------------------------------------------------------------------------------------------------------------------------------------|
| Proline-rich<br>protein 4-like<br>[ <i>C. sinensis</i> ]             | XP_006487410.1 | 55.8 | 598  | 1.5% | <p>MRILPGSRGALVCFLVPLLFAVSLCHAKDKAVEVVGTGECADC</p> <p>AQSNFKTSQAFSGLRVTIDCKSKNGEFKTRGTGELDEEGQFKV</p> <p>SLPEEIVEDGKLKDECYAQVHSSATPCPAYDGLESSKIVLKT</p> <p>KINGKHTFGLAKKLKFSPTVCASAFFWPHFKYPPLPKWSHPKF</p> <p>KLPHLKSFGHHPFPFPKSFPPKFKKPLPIPKFKKPLPIPK</p> <p>IPPVPFYKPKPIPKVIPPIPIYKPKPIPKVLPPPIPIYK<b>L</b></p> <p><b>KPPIPK</b>LLPIPIYKPKPIPKVLPPPIPIYKPKPIPKVLPP</p> <p>IPYKPKPIPKVLPPVPIYKPKPIPKLLPIPIYKPKPI</p> <p>PKLLPIPIYKPKPIPKVLPPPIPIYKPKPIPKVLPPPI</p> <p>YKPKPIPKVLPPPIPIFKPKPIPKVLPLVPTYKPKPIPK</p> <p>VLPLPIYKPKPIFKLLPLPKIPFPKPCPPLPKLPLP</p> <p>KIPPKYNDHPKFGKWRPLPLPLPLFPSHP</p> |
| Uncharacterized<br>protein<br>LOC102616407<br>[ <i>C. sinensis</i> ] | XP_006483435.1 | 28.3 | 26.5 | 3%   | <p>MMVAMVKDEWVRAAMMDDSVVVELLVRLKKQTNHVVKSEAEAV</p> <p>AVPLRWGIRQRRSRSCDAVSMRRKDAADSANNMRSPTTP</p> <p>LSWSGGSGGAASPSATADEETSRHQTSAVRSKGTATNETTGN</p> <p>STKRSRKKKTFAQLKEEEGFLK<b>ERIHLNK</b>ELETLRATYIQS</p> <p>AKNENLKRIKLDLGLDSGKNSSESHVDNGLASSTFPSQSAIID</p> <p>LPRLEYCETHEVVPAAHSSLCLLPDLNMTPAEDDSASETYGMS</p>                                                                                                                                                                                                                                                                                   |

|                                                                |                |      |      |      |                                                                                                                                                                                                                                                                                                                                                                                                                                                                                                                                                                                                                                                                 |
|----------------------------------------------------------------|----------------|------|------|------|-----------------------------------------------------------------------------------------------------------------------------------------------------------------------------------------------------------------------------------------------------------------------------------------------------------------------------------------------------------------------------------------------------------------------------------------------------------------------------------------------------------------------------------------------------------------------------------------------------------------------------------------------------------------|
| Beta-hexosaminidase 2-like<br>[ <i>C. sinensis</i> ]           | XP_006492777.1 | 66.5 | 79.7 | 3.5% | MARAIIFISLSQLCLLSLQSDPINVWPKPRIFSWPKPEATSL<br>AAEFKIQAPMQTQLSSAVDRYLKLIKSEHHHHLVRPSINISS<br>PPLQTLNISVDNISVPLTHGVNESYSVTITSDENTAYLVASTV<br>WGAMRGLETFSQLVWGNPSCVAVGIYVWDEPLFSHRGLLLDTS<br>RNYEVDLILRTISAMSANKLNVFHHITDSHSFPLLLPSDPN<br>LAAKGSYGEDYLYTPSDVKKIIEYGLDYGVRVVEIDTPGHSG<br>SWAGAHPEIVSCANKFWWPAGTKWEDRLASEPGTGQLNPLHPK<br>TFGVMINVLENVASIFFENFFHSGGDEILPACWKSDSLIQSFL<br>STGGTLEVLEKFINFVFPFIVALDKTAIWEDVILDNEIKVD<br>PSYLYPEYTIFQSWKNGTESTKKIVQAGYRVIVSSDYLYLDC<br>GHGGFLGNDSLYDQPPEIQKAAGGGSWCSPFKTWQTVYNYDIT<br>EGLTEEEKELVLGGEVALWSEQADGTVLDARLWPRTSAMAELWSGNRDETGKK<br>RYAEATDRLNEWRRHMRVNRGIGAEPIQLWCL<br>QNPGMCNTVHAYNSGDDEENVTLSTGSADFKGFADSS |
| Hypothetical protein<br>CISIN_1g0011<br>[ <i>C. sinensis</i> ] | KDO77096.1     | 64.2 | 57.9 | 1.5% | DLWSGSEGGGIKWPEAIEKALSLKPEERHTAALIVERSYID<br>LRSHLSVNGFSSILTSIDKNLLSDHSRAKVWSAGFLSFALWDA<br>RTRELLKVFNDGQIENRVDMSELLPDFAMEDEFKTKIVTSSKK<br>DKAQSSFGFFQSRNAIMGAADAVRRVAAGGGFGDDNRRTEAL<br>TTSIDGMIWTGGANGLLLQWDPNGNRLQDFQYLPFAVQCLCTF<br>GSQIWVGYMNGIVQVLDLEGNLLGGWVAHSSPVIKMAVGAGYI<br>FTLANHGGIRGWNVTSPGPLDSILCKELAGKEFLYTRMENLKI<br>LAGTWNVGQGRASQDALISWLGSAASDVGIVVVGLEQEVEMGAG<br>FLAMSAKETVGLGSAVGHWWLDMIGKILDDGSTFERVGSRQ                                                                                                                                                                                                                                 |



|                                                                   |                |       |      |    |                                                                                                                                                                                                                                                                                                                                                                                                                                                                                                                                                                                                                                                                                                                                                                       |
|-------------------------------------------------------------------|----------------|-------|------|----|-----------------------------------------------------------------------------------------------------------------------------------------------------------------------------------------------------------------------------------------------------------------------------------------------------------------------------------------------------------------------------------------------------------------------------------------------------------------------------------------------------------------------------------------------------------------------------------------------------------------------------------------------------------------------------------------------------------------------------------------------------------------------|
|                                                                   |                |       |      |    | LAGLLIAVWVRKNLKDYVGDDVAAVPCGFGRAIGNKGAVGLR<br>VRVYDRIMCFVNCHFAAHLEAVNRRNADFDHVYRTMTFCRPSN<br>LCSAAAAGASSVVQMLRSTNPLSGLTVEGVPELSEADMVIFLG<br>DFNYRLDGITYDEARDFISQRCFDWLRERDQLRAEMEAGNVFQ<br>GMREADIKFPPTYKFEKHLAGLAGTL                                                                                                                                                                                                                                                                                                                                                                                                                                                                                                                                                 |
| Protein<br>chromatin<br>remodeling<br>isoform X1<br>[C. sinensis] | XP_006465090.1 | 132.7 | 33.1 | 1% | MAEKSKPRSLNDSHYRLLQDLASPTNRSALSSFSEYEKPSV<br>AKHLASSKLNDNASVKRLQFSDTTRFDSTLDDKKPVKVEAEVR<br>TNDCSVLSRDHDHVESRSVIDEEKPKVKIEGRRRLCKVSSRD<br>VDNTENRAVVDDEPNFSDITDFDSPLQSKTVSTMVNIESRAVI<br>DDGPKFSDITVFDSPPKAKTVSENDNYKGGNEIRDILNDLSAR<br>LEILSIDKRRVPKTVDPEDDFSRLVKNGDTGQGSKGNLPEYAS<br>AESSFSLTSDLSDSSSGVTKDNVGGVVESVADEYEESKGDDVA<br>DEEQETENVGIGLKRNEPRWVDNNLVSARESFESNLDGEEDGG<br>SLGEVEGDEHLSRVHETKKHHQRQKKNPKRVHDGERFNGQSF<br>VSGGREEYDDEDDCVIVSGKLVVNRPDRRDGKLNKSAHSGLVN<br>VLDDYSDDSVLEDEGSITLSGPRSTYMLPGKIGNMLFPHQREG<br>LRWLWSLHCQGKGGILGDDMGLGKTMQICGFLAGLFHSRLIKR<br>ALVVAPKTLTSHWIKELTAVGLSAKIREYFGTCVKTRQYELQY<br>VLQDKGVLLTTYDIVRNNSKSLRGSSFISDEAGDDDAIWYMI<br>LDEGHLIKNPSTQRAKSLLEIPSAHRIISGTPIQNNLKLWA<br>LFNFCCPELLGDNKWFKEKYELPILRGNDKHALDREKRIGSAV |

AKELRERIQPYFLRRLKNEVFHEDDVTSSATLSKKNEMIVWLR  
 LTSCQRQLYEAFNLSEIVLSAFDGSPLAALTILKKICDHPLLL  
 TKRAAEDVLDGMSMLNPEDAALAEKLAMHIADVAEKDDFQEQ  
 HDNISCKISFILSLLDKLIPEGHNVLFISQTRKMLNLIQESIG  
 SKGYKFLRIDGTTKASDRVKIVNDFQEGDVAPIFLLTSQVGGL  
 GLTLTKADRVIVVDPAWNPSTDNQSVDRAYRIGQKKDVVVYRL  
 MTCGTVEEKIYRKQIFKGGLFKTATEHKEQIRYFSQQDLRELL  
 SLPKQGFVSLTQQQLHEEHGDQHNMDSELEAHIQFLDTLGIA  
 GVSHHSLLFSKTARVQVVQEEEEATRRKGTA FVGNSSSSYLVA  
 RNVDGAEYAFNPRDIKLNKSSSPKNEAKLKESDIKERIKRLS  
 QLISNKVTVERLPDKGTLQKQIAELNSELNLIKMEKRPEPGV  
 IDLDDVTGKLQRGLFLTQQF

---

\*Empty boxes = there are no registered NCBI Reference Sequences in the platform.

\*\*Peptides in red = identified by MS.

## Reference

1. Ballotin, D.; Fulaz, S.; Souza, M.L.; Corio, P.; Rodrigues, A.G.; Souza, A.O.; Marcato, P.G.; Gomes, A.F.; Gozzo, F.; Tasic, L. Elucidating protein involvement in the stabilization of the biogenic silver nanoparticles. *Nanoscale Res. Lett.* **2016**, *11*, 313.
